# Supplementary material for: Incidence of acute kidney disease after receiving hematopoietic stem cell transplantation: a single-center retrospective study
Source: PeerJ. 2019 Feb 28;7:e6467. doi: 10.7717/peerj.6467 (PMC6397753; doi:10.7717/peerj.6467)
Supplement: Supplemental Information 1 [file peerj-07-6467-s001.xls]

## Sheet: TRUMP2
															on admission							day0							day30							day100
Age	Sex	Underlying Disease	Transplantation manner	Height	Weight	DM	HTN	irradiation	Blood type(recipient）	Blood type(donor)	creatinine	Ccr	eGFR	urinary protein	U-TP	tPA	PAI-1	creatinine	Ccr	eGFR	urinary protein	U-TP	tPA	PAI-1	creatinine	Ccr	eGFR	urinary protein	U-TP	tPA	PAI-1	creatinine	Ccr	eGFR	urinary protein	U-TP	tPA	PAI-1	creatinine	creatinine	medication
18	M	ALL	Allo-BM	175	58	N	N	10Gy	O	O	0.7	161	N/A	-		N/A	N/A	0.6	N/A	N/A	－	N/A	N/A	25	1	N/A	N/A	＋－	N/A	N/A	35	0.7	N/A	N/A	－	N/A	N/A	N/A	0.5	0.6	heparin	56000U	dexamethasone	28㎎	metoclopramide	34ml	2-mercaptoethane sulfonate Na	10200㎎	furosemide
17	M	ALL	Allo-BM	168	58	N	N	10Gy	B	B	0.6	147	N/A	－	298	N/A	N/A	0.5	N/A	N/A	－	N/A	N/A	11	0.6	N/A	N/A	－	N/A	N/A	12	0.7	N/A	N/A	－	N/A	N/A	26	0.5	0.5	heparin	36000U	dexamethasone	20㎎	metoclopramide	16ml	2-mercaptoethane sulfonate Na	8400㎎	granisetron hydrochloride
18	M	ALL	Allo-PB	168	53	N	N	none	B	B	0.6	N/A	N/A	＋－	N/A	N/A	N/A	0.3	N/A	N/A	－	N/A	N/A	N/A	death	N/A	N/A	N/A	N/A	N/A	N/A	N/A	N/A	N/A	N/A	N/A	N/A	N/A	0.4	0.3	heparin	40000U	cefepim	16ｇ	granisetron hydrochloride	30㎎	fludarabine	200㎎	melphalan
18	F	ALL	Allo-BM	164	48	N	N	1Gｙ	B	B	0.6	N/A	N/A	－	N/A	N/A	N/A	0.5	N/A	N/A	－	N/A	N/A	N/A	0.9	N/A	N/A	1+	N/A	N/A	N/A	0.6	N/A	N/A	－	N/A	N/A	N/A	0.5	0.6	heparin	32500U	dexamethasone	20㎎	metoclopramide	10ml	granisetron hydrochloride	24㎎	cyclophosphamide
56	M	MDS	Allo-PB	179	63	N	N	12Gy	B	B	0.8	N/A	N/A	1＋	N/A	N/A	N/A	0.5	N/A	N/A	1＋	N/A	N/A	N/A	0.3	N/A	N/A	2＋	N/A	N/A	N/A	death	N/A	N/A	N/A	N/A	N/A	N/A	0.6	0.5	heparin	42000U	cefepim	14ｇ	metoclopramide	12ml	2-mercaptoethane sulfonate Na	8400㎎	granisetron hydrochloride
37	M	ML	Allo-BM	180	60	N	N	10Gy	B	B	0.7	N/A	N/A	－	N/A	N/A	N/A	0.4	N/A	N/A		N/A	N/A	N/A	0.6	N/A	N/A	１＋	N/A	N/A	N/A	0.6	N/A	N/A	N/A	N/A	N/A	N/A	0.4	0.4	heparin	45500U	dexamethasone	16㎎	metoclopramide	8ml	2-mercaptoethane sulfonate Na	7200㎎	granisetron hydrochloride
42	F	AML	Allo-BM	163	46	N	N	12Gy	O	O	0.6	N/A	N/A	－	N/A	N/A	N/A	0.4	N/A	N/A	－	N/A	N/A	N/A	0.6	N/A	N/A	－	N/A	N/A	N/A	0.7	N/A	N/A	N/A	N/A	N/A	N/A	0.4	0.3	heparin	32500U	dexamethasone	24㎎	metoclopramide	16ml	2-mercaptoethane sulfonate Na	6000㎎	granisetron hydrochloride
19	M	ML	Allo-PB	172	57	N	N	none	O	O	0.7	N/A	N/A	＋－	N/A	N/A	N/A	6	N/A	N/A	－	N/A	N/A	N/A	death	N/A	N/A	N/A	N/A	N/A	N/A	N/A	N/A	N/A	N/A	N/A	N/A	N/A	0.6	2.8	heparin	25000U	cefepim	24ｇ	ganciclovir	2850㎎	granisetron hydrochloride	36㎎	carboplatin
60	M	AML	Allo-BM	165	60	N	N	2Gy	B	O	0.7	N/A	N/A	－	N/A	N/A	N/A	0.5	N/A	N/A	＋－	N/A	N/A	N/A	0.6	N/A	N/A	－	N/A	N/A	N/A	0.7	N/A	N/A	1＋	N/A	N/A	N/A	0.7	0.6	heparin	35000U	granisetron hydrochloride	9㎎	metoclopramide	2ml	fludarabine	135㎎	ciclosporin
38	M	AA	Allo-PB	163	44	N	Y	3Gy	O	B	0.6	N/A	N/A	⊶	N/A	N/A	N/A	0.5	N/A	N/A	⊶	N/A	N/A	N/A	0.7	N/A	N/A	⊶	N/A	N/A	N/A	0.6	N/A	N/A	⊶	N/A	N/A	N/A	0.7	0.5	heparin	30000U	dexamethasone	4㎎	metoclopramide	２ml	granisetron hydrochloride	21㎎	fludarabine
43	M	AML	Allo-BM	166	66	N	N	none	A	A	0.6	N/A	N/A	＋－	N/A	N/A	N/A	0.5	N/A	N/A	1＋	N/A	N/A	54	0.7	N/A	N/A	⊶	N/A	N/A	13	0.8	N/A	N/A	N/A	N/A	N/A	N/A	0.5	0.5	heparin	35000U	dipotassium glycyrrhizinate	200ml	metoclopramide	10ml	granisetron hydrochloride	30㎎	furosemide
22	F	AML	Allo-BM	159	58	N	N	none	AB	B	0.5	N/A	N/A	⊶	N/A	N/A	N/A	0.4	N/A	N/A		N/A	N/A	N/A	0.5	N/A	N/A	⊶	N/A	N/A	N/A	0.5	N/A	N/A	1＋	N/A	N/A	N/A	0.4	0.4	heparin	40000U	ciprofloxacin	3000㎎	busulfan	700㎎	2-mercaptoethane sulfonate Na	7200㎎	granisetron hydrochloride
59	F	ALL	UR-CB	161	58	N	N	none	A	O	0.5	N/A	N/A	⊶	N/A	N/A	N/A	0.4	N/A	N/A	⊶	N/A	N/A	N/A	0.5	N/A	N/A	⊶	N/A	N/A	N/A	0.5	N/A	N/A	N/A	N/A	N/A	N/A	0.4	0.4	heparin	40000U	dexamethasone	4㎎	metoclopramide	２ml	granisetron hydrochloride	30㎎	fludarabine
18	M	AA	Allo-BM	178	50	N	N	none	A	A	0.7	N/A	N/A	-	N/A	N/A	N/A	0.6	N/A	N/A	＋－	N/A	N/A	N/A	0.6	N/A	N/A	⊶	N/A	N/A	N/A	0.6	N/A	N/A	⊶	N/A	N/A	N/A	0.6	6	heparin	30000U	ganciclovir	1350㎎	hydrocortisone sodium succinate	600㎎	hydrocortisone sodium succinate	625㎎	granisetron hydrochloride
36	M	AML	Allo-PB	166	52	N	N	none	A	AB	0.6	N/A	N/A	⊶	N/A	N/A	N/A	0.7	N/A	N/A	⊶	N/A	N/A	N/A	0.6	N/A	N/A	⊶	N/A	N/A	N/A	death	N/A	N/A	N/A	N/A	N/A	N/A	0.6	0.7	heparin	44000U	busulfan	240㎎	granisetron hydrochloride	27㎎	2-mercaptoethane sulfonate Na	7200㎎	cyclophosphamide
53	F	AML	UR-CB	160	55	N	N	2Gy	O	O	0.5	N/A	N/A	⊶	N/A	N/A	N/A	0.4	N/A	N/A	⊶	N/A	N/A	N/A	0.5	N/A	N/A	＋－	N/A	N/A	N/A	0.7	N/A	N/A	1＋	N/A	N/A	N/A	N/A	0.3	heparin	40000U	dexamethasone	4㎎	metoclopramide	2ml	granisetron hydrochloride	30㎎	fludarabine
48	M	AML	UR-BM	175	65	N	N	none	AB	A	0.8	N/A	N/A	⊶	N/A	N/A	N/A	0.7	N/A	N/A	⊶	N/A	N/A	N/A	1.4	N/A	N/A	⊶	N/A	N/A	N/A	1.4	N/A	N/A	⊶	N/A	N/A	N/A	0.7	0.8	heparin	40000U	busulfan	900㎎	tacrolimus hydrate	5㎎	granisetron hydrochloride	30㎎	fludarabine
61	M	AML	UR-CB	160	56	N	N	2Gy	A	A	0.7	N/A	N/A	－	N/A	N/A	N/A	0.9	N/A	N/A	＋－	N/A	N/A	N/A	0.9	N/A	N/A	⊶	N/A	N/A	N/A	death	N/A	N/A	N/A	N/A	N/A	N/A	N/A	1	heparin	6000U	heparin	2000U	hydrocortisone sodium succinate	300㎎	tazobactam/piperacillin	31.5㎎	granisetron hydrochloride
49	M	AML	UR-BM	159	50	N	N	none	B	O	0.7	N/A	N/A	－	N/A	N/A	N/A	0.6	N/A	N/A	⊶	N/A	N/A	N/A	0.8	N/A	N/A	＋－	N/A	N/A	N/A	1	N/A	N/A	－	N/A	N/A	N/A	0.5	0.6	heparin	40000U	granisetron hydrochloride	51㎎	immunoglobulin	10ｇ	fludarabine	225㎎	busulfan
32	F	MDS	Allo-BM	163	47	N	N	none	A	A	0.6	N/A	N/A	＋－	N/A	N/A	N/A	0.5	N/A	N/A	＋－	N/A	N/A	N/A	0.7	N/A	N/A	1＋	N/A	N/A	N/A	0.5	N/A	N/A	＋－	N/A	N/A	N/A	0.4	0.5	heparin	25000U	2-mercaptoethane sulfonate Na	7200㎎	cyclophosphamide	6000㎎	granisetron hydrochloride	42㎎	fludarabine
44	M	AML	Allo-BM	176	62	N	N	none	A	AB	0.7	N/A	N/A	＋－	N/A	N/A	N/A	0.7	N/A	N/A	＋－	N/A	N/A	N/A	0.8	N/A	N/A	3＋	N/A	N/A	N/A	0.7	N/A	N/A	＋－	N/A	N/A	N/A	0.6	0.6	heparin	56000U	granisetron hydrochloride	36㎎	busulfan	960㎎	cyclophosphamide	9000㎎	furosemide
66	M	AML	UR-CB	162	51	N	N	2Gy	A	O	1	N/A	N/A	－	N/A	N/A	N/A	0.6	N/A	N/A	＋－	N/A	N/A	N/A	death	N/A	N/A	N/A	N/A	N/A	N/A	N/A	N/A	N/A	N/A	N/A	N/A	N/A	N/A	0.7	heparin	36000U	danaparoid sodium	8A	amphotericine B	50㎎	hydrocortisone sodium succinate	300㎎	potassium l-aspartate
23	M	ALL	UR-CB	165	50	N	N	none	A	AB	0.6	N/A	N/A	＋－	N/A	N/A	N/A	0.4	N/A	N/A	＋－	N/A	N/A	N/A	0.9	N/A	N/A	－	N/A	N/A	N/A	2	N/A	N/A	＋－	N/A	N/A	N/A	0.4	0.4	heparin	40000U	ganciclovir	15000㎎	immunoglobulin	10000㎎	tacrolimus	5㎎	metoclopramide
70	M	AML	UR-CB	166	70	N	N	4Gy	A	A	0.8	N/A	N/A	－	N/A	N/A	N/A	0.9	N/A	N/A	－	N/A	N/A	N/A	1	N/A	N/A	＋－	N/A	N/A	N/A	death	N/A	N/A	N/A	N/A	N/A	N/A	N/A	1.2	heparin	54000U	metoclopramide	4ml	dexamethasone	8㎎	immunoglobulin	75000㎎	amphotericine B
60	M	AML	UR-BM	178	56	Y	N	2Gy	O	B	1.1	N/A	N/A	1＋	N/A	N/A	N/A	0.9	N/A	N/A	2＋	N/A	N/A	N/A	0.9	N/A	N/A	2＋	N/A	N/A	N/A	1.4	N/A	N/A	3＋	N/A	N/A	N/A	N/A	1.2	heparin	30000U	fuludarabine	300㎎	busulfan	384㎎	granisetron hydrochloride	27㎎	metoclopramide
47	M	ALL	UR-CB	175	55	N	N	10Gy	A	O	1.1	N/A	N/A	1＋	N/A	N/A	N/A	0.7	N/A	N/A	－	N/A	N/A	N/A	1.9	N/A	N/A	1＋	N/A	N/A	N/A	death	N/A	N/A	N/A	N/A	N/A	N/A	0.6	0.9	heparin	48000U	dexamethasone	160㎎	hydrocortisone sodium succinate	100㎎	cytrabine	9000㎎	cyclophosphamide
59	M	ALL	UR-CB	177	59	Y	N	4Gy	A	A	0.5	N/A	N/A	＋－	N/A	N/A	N/A	0.5	N/A	N/A	－	N/A	N/A	N/A	0.5	N/A	N/A	－	N/A	N/A	N/A	0.5	N/A	N/A	＋－	N/A	N/A	N/A	0.5	0.5	heparin	36000U	fuludarabine	340㎎	cyclophosphamide	3400㎎	granisetron hydrochloride	15㎎	2-mercaptoethane sulfonate Na
36	F	AML	UR-CB	161	50	N	N	none	A	O	0.5	N/A	N/A	-	N/A	N/A	N/A	0.4	N/A	N/A	+-	N/A	N/A	N/A	0.5	N/A	N/A	-	N/A	N/A	N/A	N/A	N/A	N/A	N/A	N/A	N/A	N/A	0.3	0.3	heparin	40000U	granisetron hydrochloride	24㎎	immunoglobulin	7500㎎	busulfan	558.48㎎	fludarabine
36	F	AML	UR-CB	161	50	N	N	none	A	O	0.5	N/A	N/A	-	N/A	N/A	N/A	0.3	N/A	N/A	-	N/A	N/A	N/A	death	N/A	N/A	N/A	N/A	N/A	N/A	N/A	N/A	N/A	N/A	N/A	N/A	N/A	0.4	0.5	heparin	40000U	hydrocortisone sodium succinate	600㎎	tazobactam/piperacillin	18ｇ	lansoprazole	480㎎	itraconazole
57	M	MDS	UR-CB	164	58	N	N	none	B	B	2	N/A	N/A	＋-	N/A	N/A	N/A	1.3	N/A	N/A	1+	N/A	N/A	N/A	death	N/A	N/A	N/A	N/A	N/A	N/A	N/A	N/A	N/A	N/A	N/A	N/A	N/A	1.3	1.2	heparin	30000U	cefepim	7ｇ	fludarabine	80㎎	cyclophosphamide	3000㎎	2-mercaptoethane sulfonate Na
63	F	CML	UR-CB	150	43	N	Y	none	A	O	0.6	N/A	N/A	N/A	N/A	N/A	N/A	0.7	N/A	N/A	N/A	N/A	N/A	N/A	0.5	N/A	N/A	N/A	N/A	N/A	N/A	0.7	N/A	N/A	N/A	N/A	N/A	N/A	0.5	0.5	heparin	25000U	granisetron hydrochloride	36㎎	fludarabine	240㎎	busulfan	279.84㎎	hydrocortisone sodium succinate
61	F	ML	UR-CB	157	48	N	Y	4Gy	A	A	0.5	N/A	94	＋-	N/A	<=30.0	N/A	0.4	N/A	N/A	＋－	N/A	N/A	21	0.6	N/A	N/A	＋－	N/A	N/A	17	0.7	N/A	N/A	＋－	N/A	N/A	N/A	0.3	0.4	heparin	40000U	granisetron hydrochloride	15㎎	fludarabine	108㎎	melphalan	110㎎	hydrocortisone sodium succinate
34	M	ALL	UR-BM	163	45	N	N	none	O	B	0.5	N/A	N/A	＋-	N/A	N/A	N/A	0.4	N/A	N/A	-	N/A	N/A	14	0.4	N/A	N/A	4＋	4590	N/A	<=10.0	0.7	N/A	N/A	-	N/A	N/A	N/A	0.3	0.3	heparin	40000U	granisetron hydrochloride	36㎎	busulfan	576㎎	cyclophosphamide	1400㎎	2-mercaptoethane sulfonate Na
59	F	AML	UR-BM	150	52	N	N	none	A	O	0.6	N/A	78	-	N/A	N/A	N/A	0.6	N/A	N/A	-	N/A	N/A	N/A	0.7	N/A	N/A	-	N/A	N/A	N/A	0.8	N/A	N/A	1+	N/A	N/A	N/A	0.5	0.6	heparin	40000U	granisetron hydrochloride	18㎎	hydrocortisone sodium succinate	250㎎	immunoglobulin	75000㎎	fludarabine
61	F	AML	UR-CB	149	53	N	N	4Gy	O	O	0.8	N/A	N/A	-	N/A	N/A	N/A	0.8	N/A	N/A	-	N/A	N/A	N/A	1.5	N/A	N/A	-	N/A	N/A	N/A	3.1	N/A	13	＋－	N/A	N/A	N/A	0.8	1.2	heparin	40000U	granisetron hydrochloride	18㎎	fludarabine	105㎎	melphalan	115㎎	dexamethasone
35	M	AML	UR-BM	175	76	N	N	10Gy	O	A	0.9	N/A	N/A	-	N/A	N/A	N/A	0.7	N/A	N/A	-	N/A	N/A	N/A	0.7	N/A	N/A	＋－	N/A	N/A	N/A	1.4	N/A	N/A	＋－	N/A	N/A	N/A	0.7	0.5	heparin	49000U	granisetron hydrochloride	30㎎	cytarabine	7600㎎	cyclophosphamide	8800㎎	2-mercaptoethane sulfonate Na
40	M	MDS	UR-BM	176	80	N	Y	none	A	O	0.6	N/A	N/A	-	N/A	N/A	N/A	1	N/A	N/A	2＋	N/A	N/A	19	1.2	N/A	67	1＋	N/A	N/A	<=10.0	death	N/A	N/A	N/A	N/A	N/A	N/A	0.8	1.7	heparin	55000U	granisetron hydrochloride	33㎎	immunoglobulin	10000㎎	cyclophosphamide	9400㎎	ciclosporin
60	M	OTHER	UR-CB	168	59	N	N	none	A	A	0.6	N/A	76	＋－	N/A	N/A	N/A	0.5	N/A	N/A	－	N/A	N/A	N/A	0.8	N/A	N/A	1＋	N/A	N/A	N/A	death	N/A	N/A	N/A	N/A	N/A	N/A	0.4	0.5	heparin	42000U	granisetron hydrochloride	36㎎	busulfan	384㎎	immunoglobulin	10000㎎	hydrocortisone sodium succinate
60	M	OTHER	UR-CB	168	59	N	N	none	A	B	0.6	N/A	76	＋－	N/A	N/A	N/A	0.5	N/A	N/A	－	N/A	N/A	N/A	death	N/A	N/A	N/A	N/A	N/A	N/A	N/A	N/A	N/A	N/A	N/A	N/A	N/A	0.6	0.8	heparin	4000U	granisetron hydrochloride	6㎎	immunoglobulin	10000㎎	amphotericine B	1200㎎	lenograstim
34	F	AML	Allo-BM	159	48	N	N	6Gy	B	O	0.4	N/A	N/A	-	N/A	N/A	N/A	0.3	N/A	N/A	－	N/A	N/A	N/A	0.3	N/A	N/A	－	N/A	N/A	N/A	0.4	N/A	142	－	N/A	N/A	N/A	0.3	0.3	heparin	27000U	granisetron hydrochloride	24㎎	hydrocortisone sodium succinate	600㎎	micafungin	600㎎	dexamethasone
35	F	AML	UR-CB	159	48	N	N	none	B	O	0.3	N/A	142	-	N/A	N/A	N/A	0.3	N/A	N/A	-	N/A	N/A	N/A	0.3	N/A	N/A	－	N/A	N/A	N/A	death	N/A	N/A	N/A	N/A	N/A	N/A	N/A	0.3	heparin	35000U	granisetron hydrochloride	18㎎	fludarabine	225㎎	daunorubicin	60㎎	busulfan
64	M	AML	UR-CB	168	51	Y	N	2Gy	A	B	0.5	N/A	N/A	＋－	N/A	N/A	N/A	0.4	N/A	N/A	－	N/A	N/A	<=10.0	1.5	N/A	N/A	1＋	N/A	N/A	>=200.0	death	N/A	N/A	N/A	N/A	N/A	N/A	0.4	0.4	heparin	36600U	granisetron hydrochloride	21㎎	fludarabine	195㎎	melphalan	120㎎	hydrocortisone sodium succinate
18	F	AML	Allo-BM	169	70	N	N	10Gy	A	B	0.5	N/A	N/A	－	N/A	N/A	N/A	0.4	N/A	N/A	－	N/A	N/A	N/A	1.4	N/A	N/A	1＋	N/A	N/A	N/A	0.6	N/A	N/A	－	N/A	N/A	N/A	0.4	0.4	heparin	56000U	granisetron hydrochloride	27㎎	dexamethasone	23.1㎎	cyclophosphamide	8000㎎	hydrocortisone sodium succinate
53	F	ML	Auto-PB	153	49	N	N	none	A		0.4	N/A	N/A	－	N/A	N/A	N/A	0.3	N/A	N/A	－	N/A	N/A	N/A	0.4	N/A	125	－	N/A	N/A	N/A	0.5	N/A	98	－	N/A	N/A	N/A	0.3	0.4	heparin	35000U	granisetron hydrochloride	33㎎	immunoglobulin	10000㎎	etopocide	1120㎎	ranimustine
70	M	AML	UR-BM	153	56	Y	Y	2Gy	O	O	0.8	N/A	N/A	－	N/A	N/A	N/A	0.6	N/A	N/A	－	N/A	N/A	31	0.8	N/A	N/A	－	N/A	N/A	<=10.0	1.4	N/A	40	＋－	N/A	N/A	21	N/A	0.7	heparin	61000U	granisetron hydrochloride	24㎎	fludarabine	225㎎	tacrolimus	2㎎	imnoglobulin
51	M	ML	Auto-PB	180	71	N	N	none	A		0.5	N/A	N/A	－	N/A	N/A	N/A	0.6	N/A	N/A	－	N/A	N/A	N/A	0.8	N/A	N/A	－	N/A	N/A	N/A	1.1	N/A	N/A	－	N/A	N/A	N/A	0.6	0.5	heparin	42000U	granisetron hydrochloride	30㎎	immunoglobulin	10000㎎	cytrabine	2960㎎	melphalan
41	M	ALL	Allo-BM	179	71	N	N	10Gy	A	A	0.7	N/A	N/A	－	N/A	N/A	N/A	0.6	N/A	N/A	＋－	N/A	N/A	N/A	0.7	N/A	N/A	－	N/A	N/A	N/A	0.7	N/A	N/A	－	N/A	N/A	N/A	0.6	0.6	heparin	56000U	granisetron hydrochloride	33㎎	dexamethasone	19.8㎎	hydrocortisone sodium succinate	100㎎	2-mercaptoethane sulfonate Na
42	M	ALL	UR-CB	181	70	N	N	none	A	A	1	N/A	N/A	－	N/A	N/A	N/A	0.5	N/A	N/A	－	N/A	N/A	16	0.6	N/A	N/A	－	N/A	N/A	<=10.0	0.7	N/A	N/A	－	N/A	N/A	N/A	0.6	0.8	heparin	42000U	granisetron hydrochloride	18㎎	fludarabine	235㎎	melphalan	250㎎	imnoglobulin
25	M	ML	Allo-BM	173	60	N	N	12Gy	B	B	0.5	N/A	164	－	N/A	N/A	N/A	0.5	N/A	N/A	－	N/A	N/A	<=10.0	0.6	N/A	N/A	＋－	N/A	N/A	<=10.0	1	N/A	N/A	＋－	N/A	N/A	>=200	0.4	0.4	heparin	50000U	granisetron hydrochloride	33㎎	cytarabine	10200㎎	cyclophosphamide	7000㎎	2-mercaptoethane sulfonate Na
60	F	MDS	UR-CB	159	45	N	N	4Gｙ	A	O	0.5	N/A	N/A	1＋	N/A	N/A	N/A	0.5	N/A	N/A	－	N/A	N/A	29	1.9	N/A	N/A	1＋	N/A	N/A	>=200	death	N/A	N/A	N/A	N/A	N/A	N/A	0.4	0.9	heparin	36000U	granisetron hydrochloride	21㎎	amikacin sulfate	400㎎	fludarabine	140㎎	melphalan
55	M	AML	UR-BM	163	62	N	N	none	O	B	0.7	N/A	N/A	－	N/A	N/A	N/A	0.8	N/A	N/A	－	N/A	N/A	N/A	1.3	N/A	N/A	1＋	N/A	N/A	N/A	death	N/A	N/A	N/A	N/A	N/A	N/A	0.6	0.7	heparin	42000U	granisetron hydrochloride	33㎎	fludarabine	250㎎	busulfan	700㎎	ciclosporin
48	F	AML	Allo-PB	157	40	N	Y	none	AB	B	0.6	N/A	N/A	－	N/A	N/A	N/A	0.8	N/A	N/A	－	N/A	N/A	41	1.2	N/A	N/A	－	N/A	N/A	11	1.4	N/A	N/A	1＋	N/A	N/A	N/A	0.9	0.8	heparin	32000U	granisetron hydrochloride	27㎎	fludarabine	200㎎	busulfan	480㎎	amphotericine B
65	F	AML	UR-CB	156	60	Y	N	４Gy	O	B	1	N/A	N/A	－	N/A	N/A	N/A	0.9	N/A	N/A	－	N/A	N/A	19	1.1	N/A	N/A	－	N/A	N/A	21	1.3	N/A	N/A	＋－	N/A	N/A	12	N/A	1	heparin	50000U	granisetron hydrochloride	21㎎	fludarabine	120㎎	melphalan	127.35㎎	tacrolimus
66	M	MDS	UR-BM	161	65	N	N	none	O	B	0.6	N/A	N/A	＋－	N/A	N/A	N/A	0.6	N/A	N/A	1+	N/A	N/A	<=10.0	death	N/A	N/A	N/A	N/A	N/A	N/A	N/A	N/A	N/A	N/A	N/A	N/A	N/A	0.6	0.6	heparin	41300U	granisetron hydrochloride	21㎎	fludarabine	245㎎	busulfan	391.68㎎	hydrocortisone sodium succinate
37	M	AML	Auto-PB	173	70	N	N	none	B		0.7	N/A	102	＋－	N/A	N/A	N/A	0.7	N/A	N/A	－	N/A	N/A	30	0.6	N/A	N/A	＋－	N/A	N/A	N/A	N/A	N/A	N/A	N/A	N/A	N/A	N/A	0.7	0.6	heparin	50000U	granisetron hydrochloride	27㎎	busulfan	684㎎	melphalan	250㎎	imnoglobulin
41	M	AML	UR-CB	170	52	N	N	12Gy	A	AB	0.8	N/A	N/A	－	N/A	N/A	N/A	0.4	N/A	N/A	－	N/A	N/A	34	0.4	N/A	N/A	－	N/A	N/A	N/A	0.3	N/A	N/A	＋－	N/A	N/A	N/A	N/A	0.4	heparin	16800U	granisetron hydrochloride	27㎎	dipotassium glycyrrhizinate	320ml	dexamethasone	3.3㎎	filgrastim
53	F	AML	UR-BM	151	63	N	N	none	A	A	0.7	N/A	N/A	－	N/A	N/A	N/A	0.4	N/A	N/A	＋－	N/A	N/A	46	0.4	N/A	N/A	1＋	N/A	N/A	29	0.8	N/A	N/A	＋－	N/A	N/A	26	0.3	0.4	heparin	51000U	granisetron hydrochloride	36㎎	busulfan	800㎎	cyclophosphamide	7400㎎	2-mercaptoethane sulfonate Na
55	F	AML	UR-CB	151	64	N	N	none	A	A	0.7	N/A	N/A	＋－	N/A	N/A	N/A	1.1	N/A	N/A	1+	N/A	N/A	>=200	death	N/A	N/A	N/A	N/A	N/A	N/A	N/A	N/A	N/A	N/A	N/A	N/A	N/A	1.1	1.7	heparin	20000U	granisetron hydrochloride	1000㎎	hydrocortisone sodium succinate	800㎎	hydrocortisone sodium succinate	542.5㎎	calcium gluconate hydrate
69	M	ML	UR-CB	166	61	Y	Y	none	A	AB	0.7	N/A	N/A	－	N/A	N/A	N/A	0.8	N/A	N/A	－	N/A	N/A	<=10.0	0.8	N/A	N/A	－	N/A	N/A	44	1.6	35	N/A	1＋	799	N/A	13	0.6	0.7	heparin	48000U	granisetron hydrochloride	18㎎	fludarabine	209.25㎎	melphalan	234.5㎎	imnoglobulin
64	M	ML	UR-CB	176	67	N	N	none	A	B	1	N/A	N/A	－	N/A	N/A	N/A	2	16	N/A	2+	991	N/A	N/A	death	N/A	N/A	N/A	N/A	N/A	N/A	N/A	N/A	N/A	N/A	N/A	N/A	N/A	1.5	2.3	heparin	39000U	granisetron hydrochloride	18㎎	fludarabine	225㎎	melphalan	250㎎	hydrocortisone sodium succinate
24	M	ML	Auto-PB	184	83	N	N	none	O		1	N/A	N/A	－	N/A	N/A	N/A	0.8	N/A	N/A	－	N/A	N/A	N/A	0.8	N/A	N/A	＋－	N/A	N/A	N/A	1	N/A	N/A	＋－	N/A	N/A	N/A	N/A	0.9	heparin	32000U	granisetron hydrochloride	42㎎	etoposide	1200㎎	cytrabine	2800㎎	ranimustine
52	F	MM/PCD	Auto-PB	159	51	N	N	none	A		0.5	N/A	N/A	－	N/A	N/A	N/A	0.4	N/A	N/A	－	N/A	N/A	N/A	0.4	N/A	N/A	－	N/A	N/A	N/A	0.5	N/A	N/A	－	N/A	N/A	N/A	0.4	0.4	dexamethasone	33㎎	granisetron hydrochloride	12㎎	melphalan	300㎎	immunoglobulin	10000㎎	hydrocortisone sodium succinate
49	M	AML	UR-BM	168	58	Y	N	none	A	A	0.7	N/A	N/A	－	N/A	N/A	N/A	0.7	N/A	N/A	－	N/A	N/A	N/A	0.7	N/A	N/A	－	N/A	N/A	N/A	N/A	N/A	N/A	N/A	N/A	N/A	N/A	0.5	0.6	heparin	40600U	granisetron hydrochloride	21㎎	fludarabine	247㎎	busulfan	369㎎	imnoglobulin
35	M	AML	UR-BM	170	66	N	N	12Gy	A	A	0.9	N/A	N/A	＋－	N/A	N/A	N/A	0.7	N/A	N/A	＋－	N/A	N/A	N/A	0.8	N/A	N/A	－	N/A	N/A	N/A	1.1	N/A	N/A	－	N/A	N/A	N/A	0.7	0	heparin	26000U	granisetron hydrochloride	24㎎	cyclophosphamide	7800㎎	2-mercaptoethane sulfonate Na	9360㎎	dexamethasone
28	M	AML	UR-CB	165	59	N	N	12Gy	AB	A	0.6	N/A	N/A	＋－	N/A	N/A	N/A	0.5	N/A	N/A	1+	N/A	N/A	<=10.0	0.5	N/A	N/A	－	N/A	N/A	N/A	0.5	N/A	N/A	1＋	N/A	N/A	15	N/A	0.5	heparin	42000U	granisetron hydrochloride	27㎎	cyclophosphamide	7236㎎	cytrabine	19.944㎎	2-mercaptoethane sulfonate Na
16	F	AML	Allo-BM	163	54	N	N	8Gy	O	O	0.5	N/A	N/A	－	N/A	N/A	N/A	0.6	N/A	N/A	－	N/A	N/A	11	2.7	N/A	N/A	2＋	N/A	N/A	41	0.6	N/A	N/A	＋－	N/A	N/A	N/A	0.5	0.4	heparin	20000U	granisetron hydrochloride	27㎎	cyclophosphamide	6708㎎	2-mercaptoethane sulfonate Na	8050㎎	dexamethasone
42	M	CML	UR-CB	174	77	N	Y	none	A	B	0.9	N/A	N/A	－	N/A	N/A	N/A	0.7	N/A	N/A	＋－	N/A	N/A	42	0.7	N/A	N/A	1＋	N/A	N/A	26	0.8	N/A	N/A	－	N/A	N/A	12	0.7	0.9	heparin	64000U	granisetron hydrochloride	36㎎	cyclophosphamide	9200㎎	busulfan	975.36㎎	2-mercaptoethane sulfonate Na
42	M	CML	UR-CB	174	74	N	Y	none	A	A	0.9	N/A	N/A	－	N/A	N/A	N/A	0.6	N/A	N/A	－	N/A	N/A	61	0.7	N/A	N/A	－	N/A	N/A	20	1.3	N/A	N/A	－	N/A	N/A	23	0.6	0.7	heparin	36000U	granisetron hydrochloride	9㎎	fludarabine	168㎎	immunoglobulin	10000㎎	dipotassium glycyrrhizinate
42	M	CML	Allo-PB	174	81	N	Y	none	A	A	0.9	N/A	N/A	－	N/A	N/A	N/A	0.7	N/A	N/A	－	N/A	N/A	<=10.0	1	N/A	N/A	－	N/A	N/A	14	2.2	28	28	－	243	N/A	19	0.7	0.9	heparin	38000U	granisetron hydrochloride	9㎎	fludarabine	174㎎	immunoglobulin	10000㎎	dipotassium glycyrrhizinate
53	M	ML	Auto-PB	176	95	N	N	none	A		1.1	N/A	N/A	－	N/A	N/A	N/A	1	N/A	N/A	－	N/A	N/A	N/A	0.9	N/A	N/A	－	N/A	N/A	N/A	1.3	N/A	N/A	－	N/A	N/A	N/A	1.2	1.2	heparin	40000U	granisetron hydrochloride	30㎎	cytarabine	3254.4㎎	etopocide	1617㎎	melphalan
57	M	ML	Auto-PB	178	74	Y	N	unknown	A		0.6	N/A	N/A	－	N/A	N/A	N/A	0.6	N/A	N/A	－	N/A	N/A	29	0.7	N/A	N/A	1＋	N/A	N/A	N/A	0.8	N/A	N/A	－	N/A	N/A	N/A	N/A	0.5	heparin	51000U	granisetron hydrochloride	30㎎	cytarabine	3040㎎	etopocide	1520㎎	melphalan
31	M	AA	UR-CB	180	68	N	N	4Gy	AB	B	0.8	N/A	N/A	－	N/A	N/A	N/A	0.6	N/A	N/A	－	N/A	N/A	N/A	0.6	N/A	N/A	－	N/A	N/A	N/A	1.2	N/A	N/A	1＋	N/A	N/A	N/A	N/A	0.5	heparin	56000U	granisetron hydrochloride	21㎎	fludarabine	236.25㎎	melphalan	150㎎	cefepime
31	M	AA	UR-CB	180	68	N	N	2Gy	AB	A	1.8	N/A	N/A	－	N/A	N/A	N/A	0.9	N/A	N/A	＋－	N/A	N/A	N/A	0.9	N/A	N/A	－	N/A	N/A	N/A	3.2	N/A	N/A	2＋	N/A	N/A	N/A	0.9	0.7	heparin	49000U	granisetron hydrochloride	9㎎	fludarabine	168㎎	hydrocortisone sodium succinate	900㎎	doripenem
42	M	AML	UR-CB	173	43	N	N	none	A	O	0.8	N/A	N/A	1＋	N/A	N/A	N/A	0.4	N/A	N/A	－	N/A	N/A	N/A	0.6	N/A	N/A	－	N/A	N/A	N/A	0.6	N/A	N/A	－	N/A	N/A	N/A	0.8	0.6	heparin	144000U	granisetron hydrochloride	18㎎	fludarabine	186.25㎎	melphalan	200㎎	amphotericine B
65	F	MM/PCD	Auto-PB	157	47	N	N	none	O		0.5	N/A	N/A	－	N/A	N/A	N/A	0.4	N/A	N/A	－	N/A	N/A	N/A	0.5	N/A	N/A	＋－	N/A	N/A	N/A	0.5	N/A	N/A	N/A	N/A	N/A	N/A	N/A	0.3	dexamethasone	33㎎	granisetron hydrochloride	12㎎	melphalan	280㎎	immunoglobulin	10000㎎	fosaprepitant meglumine
61	F	ALL	UR-BM	165	57	N	N	4Gy	B	A	0.5	N/A	N/A	－	N/A	N/A	N/A	0.6	N/A	N/A	－	N/A	N/A	21	0.5	N/A	N/A	－	N/A	N/A	N/A	1	+	N/A	－	N/A	N/A	N/A	0.5	0.5	heparin	56000U	granisetron hydrochloride	21㎎	fludarabine	164㎎	melphalan	130㎎	dexamethasone
19	F	AML	UR-BM	152	51	N	N	none	A	B	0.5	N/A	N/A	－	N/A	N/A	N/A	0.4	N/A	N/A	＋－	N/A	N/A	18	0.6	N/A	N/A	－	N/A	N/A	50	0.7	N/A	N/A	－	N/A	N/A	N/A	0.3	0.4	heparin	29000U	granisetron hydrochloride	30㎎	busulfan	489.6㎎	cyclophosphamide	6000㎎	immunoglobulin
24	M	AML	Allo-BM	181	66	N	N	none	B	B	1	N/A	N/A	1＋	N/A	N/A	N/A	0.6	N/A	N/A	＋－	N/A	N/A	N/A	0.6	N/A	N/A	－	N/A	N/A	N/A	0.8	N/A	N/A	＋－	N/A	N/A	N/A	0.5	0.6	heparin	46200U	granisetron hydrochloride	39㎎	busulfan	845.76㎎	cyclophosphamide	7932㎎	2-mercaptoethane sulfonate Na
57	F	ML	Auto-PB	156	46	N	N	none	A		0.6	N/A	N/A	－	N/A	N/A	N/A	0.5	N/A	N/A	－	N/A	N/A	N/A	0.4	N/A	N/A	－	N/A	N/A	N/A	0.5	N/A	N/A	－	N/A	N/A	N/A	0.5	0.4	heparin	20000U	granisetron hydrochloride	30㎎	cytarabine	2308.8㎎	etopocide	1154.4㎎	melphalan
60	M	MM/PCD	Auto-PB	167	71	N	N	none	O		0.9	N/A	N/A	N/A	N/A	N/A	N/A	0.8	N/A	N/A	N/A	N/A	N/A	N/A	0.9	N/A	N/A	N/A	N/A	N/A	N/A	0.8	N/A	N/A	N/A	N/A	N/A	N/A	0.8	0.7	dexamethasone	33㎎	granisetron hydrochloride	12㎎	melphalan	359.6㎎	immunoglobulin	10000㎎	hydrocortisone sodium succinate
33	M	ML	Auto-PB	163	53	N	N	none	A		0.6	N/A	N/A	－	N/A	N/A	N/A	0.5	N/A	N/A	－	N/A	N/A	N/A	0.6	N/A	N/A	－	N/A	N/A	N/A	0.6	N/A	N/A	N/A	N/A	N/A	N/A	0.4	0.5	heparin	39000U	granisetron hydrochloride	30㎎	cytarabine	2526.4㎎	ranimustine	473.7㎎	etoposide
50	F	MM/PCD	Auto-PB	161	50	N	N	none	O		0.6	N/A	N/A	－	N/A	N/A	N/A	0.5	N/A	N/A	－	N/A	N/A	N/A	0.6	N/A	N/A	－	N/A	N/A	N/A	0.5	N/A	N/A	－	N/A	N/A	N/A	0.5	0.5	dexamethasone	33㎎	granisetron hydrochloride	12㎎	melphalan	296.4㎎	hydrocortisone sodium succinate	125㎎	immunoglobulin
60	M	ML	Auto-PB	174	50	N	N	none	B		0.8	N/A	N/A	＋－	N/A	N/A	N/A	1	N/A	N/A	－	N/A	N/A	N/A	0.7	N/A	N/A	－	N/A	N/A	N/A	0.9	N/A	N/A	N/A	N/A	N/A	N/A	0.8	0.6	heparin	35000U	granisetron hydrochloride	27㎎	cytarabine	2561.6㎎	etopocide	1280..8㎎	immunoglobulin
54	M	ML	UR-CB	164	62	N	N	none	A	O	0.7	N/A	N/A	－	N/A	N/A	N/A	0.6	N/A	N/A	＋－	N/A	N/A	41	0.7	N/A	69	1＋	N/A	N/A	<=10.0	3.9	N/A	N/A	＋－	N/A	N/A	199	N/A	1	heparin	46200U	granisetron hydrochloride	30㎎	busulfan	650.88㎎	cyclophosphamide	7200㎎	2-mercaptoethane sulfonate Na
55	M	ALL	UR-BM	174	67	N	N	12Gy	O	AB	0.7	N/A	N/A	N/A	N/A	N/A	N/A	0.5	N/A	N/A	－	N/A	N/A	N/A	0.7	N/A	N/A	－	N/A	N/A	N/A	2.4	N/A	N/A	1＋	N/A	N/A	N/A	N/A	0.5	heparin	30000U	granisetron hydrochloride	27㎎	cyclophosphamide	8000㎎	2-mercaptoethane sulfonate Na	9680㎎	cefepime
36	M	ALL	UR-BM	170	79	N	N	12Gy	A	A	0.6	N/A	N/A	＋－	N/A	N/A	N/A	0.4	N/A	N/A	－	N/A	N/A	N/A	0.5	N/A	N/A	－	N/A	N/A	N/A	0.6	N/A	N/A	＋－	N/A	N/A	N/A	0.4	0.4	heparin	48000U	granisetron hydrochloride	33㎎	cytarabine	21408㎎	cyclophosphamide	8000㎎	2-mercaptoethane sulfonate Na
61	F	AML	UR-BM	154	41	N	N	none	A	A	0.6	N/A	N/A	－	N/A	N/A	N/A	0.7	N/A	N/A	＋－	N/A	N/A	43	0.7	N/A	N/A	－	N/A	N/A	35	0.6	N/A	N/A	－	N/A	N/A	N/A	N/A	0.5	heparin	32000U	granisetron hydrochloride	27㎎	busulfan	547.2㎎	fludarabine	200㎎	tacrolimus
44	F	AML	UR-BM	161	62	N	N	none	B	B	0.6	N/A	N/A	－	N/A	N/A	N/A	0.6	N/A	N/A	＋－	N/A	N/A	38	0.8	N/A	N/A	－	N/A	N/A	25	0.8	N/A	N/A	＋－	N/A	N/A	N/A	0.5	0.6	heparin	42000U	granisetron hydrochloride	27㎎	fludarabine	247.25㎎	busulfan	787.2㎎	micafungin
17	F	AA	UR-CB	151	35	N	N	4Gy	A	AB	0.6	N/A	N/A	1＋	N/A	N/A	N/A	0.3	N/A	N/A	＋－	N/A	N/A	N/A	0.4	N/A	N/A	＋－	N/A	N/A	N/A	death	N/A	N/A		N/A	N/A	N/A	0.3	0.3	heparin	28000U	granisetron hydrochloride	24㎎	fludarabine	120㎎	melphalan	98㎎	dexamethasone
51	M	AML	Allo-PB	183	84	N	N	none	A	A	0.7	N/A	N/A	－	N/A	N/A	N/A	0.7	N/A	N/A	－	N/A	N/A	N/A	0.7	N/A	N/A	－	N/A	N/A	N/A	0.7	N/A	N/A	－	N/A	N/A	N/A	0.6	0.7	heparin	68800U	granisetron hydrochloride	33㎎	cyclophosphamide	4422㎎	busulfan	943.2㎎	2-mercaptoethane sulfonate Na
49	M	OTHER	UR-BM	174	74	N	Y	none	A	A	1.2	N/A	52	1＋	N/A	N/A	N/A	1.1	N/A	N/A	－	N/A	N/A	22	1.3	N/A	N/A	－	N/A	N/A	<=10.0	1.7	N/A	N/A	－	N/A	N/A	N/A	1.1	1.1	heparin	52000U	granisetron hydrochloride	285㎎	busulfan	960㎎	tacrolimus	2㎎	immunoglobulin
52	M	OTHER	UR-CB	168	59	N	N	none	A	A	0.9	N/A	N/A	－	N/A	N/A	N/A	0.6	N/A	N/A	－	N/A	N/A	<=10.0	0.7	N/A	80	－	N/A	N/A	<=10.0	death	N/A	N/A		N/A	N/A	N/A	0.6	0.7	heparin	42000U	busulfan	707㎎	cyclophosphamide	3318㎎	2-mercaptoethane sulfonate Na	3981.6㎎	tacrolimus
33	M	ALL	Allo-BM	168	57	N	N	12Gy	A	A	0.8	N/A	N/A	－	N/A	N/A	N/A	0.5	N/A	N/A	－	N/A	N/A	N/A	0.6	N/A	N/A	＋－	N/A	N/A	N/A	0.8	N/A	N/A	＋－	N/A	N/A	N/A	0.6	0.5	heparin	42000U	granisetron hydrochloride	33㎎	cytarabine	13440㎎	cyclophosphamide	7000㎎	2-mercaptoethane sulfonate Na
62	M	MDS	UR-BM	171	77	N	N	2Gy	A	O	1.3	N/A	45	－	N/A	N/A	N/A	1.2	N/A	N/A	－	N/A	N/A	N/A	0.3	N/A	45	－	N/A	N/A	N/A	2.4	N/A	23	－	N/A	N/A	N/A	1.1	1	heparin	42000U	granisetron hydrochloride	24㎎	fludarabine	330㎎	busulfan	463.68㎎	hydrocortisone sodium succinate
61	F	MDS	UR-BM	160	58	N	N	2Gy	A	O	0.6	N/A	N/A	－	N/A	N/A	N/A	0.6	N/A	77	－	N/A	N/A	N/A	0.6	N/A	77	－	N/A	N/A	N/A	0.6	N/A	77	－	N/A	N/A	N/A	0.5	0.5	heparin	27000U	granisetron hydrochloride	27㎎	dexamethasone	3.3㎎	fludarabine	288㎎	busulfan
52	M	AML	UR-BM	165	52	N	N	none	O	O	0.9	N/A	N/A	－	N/A	N/A	N/A	0.6	N/A	N/A	－	N/A	N/A	N/A	0.9	N/A	N/A	－	N/A	N/A	N/A	1.1	N/A	N/A	－	N/A	N/A	N/A	0.5	0.6	heparin	49000U	granisetron hydrochloride	33㎎	cyclophosphamide	3852㎎	busulfan	616㎎	2-mercaptoethane sulfonate Na
40	F	MDS	Allo-PB	155	49	N	N	none	A	A	0.6	N/A	N/A	N/A	N/A	N/A	N/A	0.5	N/A	N/A	＋－	N/A	N/A	N/A	0.5	N/A	N/A	1＋	N/A	N/A	N/A	death	N/A	N/A		N/A	N/A	N/A	0.4	0.5	low molecular weight heparin	17500U	granisetron hydrochloride	27㎎	busulfan	450㎎	cyclophosphamide	5800㎎	2-mercaptoethane sulfonate Na
52	M	OTHER	UR-CB	168	60	N	N	2Gy	A	B	0.9	N/A	N/A	－	N/A	N/A	N/A	1	N/A	N/A	1＋	N/A	N/A	N/A	death	N/A	N/A	N/A	N/A	N/A	N/A	N/A	N/A	N/A		N/A	N/A	N/A	N/A	N/A	heparin	5000U	granisetron hydrochloride	6㎎	fludarabine	48.6㎎	cyclophosphamide	3240㎎	tacrolimus
66	M	AA	UR-CB	163	53	Y	Y	none	B	B	0.6	N/A	N/A	－	N/A	N/A	N/A	0.6	N/A	N/A	－	N/A	N/A	N/A	0.8	N/A	N/A	－	N/A	N/A	N/A	1	N/A	N/A	－	N/A	N/A	N/A	0.6	0.7	hydrocortisone sodium succinate	400㎎	granisetron hydrochloride	27㎎	fludarabine	193.75㎎	cyclophosphamide	6000㎎	2-mercaptoethane sulfonate Na
62	M	OTHER	UR-BM	171	70	N	N	2Gy	A	A	0.9	N/A	N/A	－	N/A	N/A	N/A	0.7	N/A	N/A	－	N/A	N/A	13	0.85	N/A	N/A	－	N/A	N/A	51	0.88	N/A	68	－	N/A	N/A	N/A	0.7	0.76	hydrocortisone sodium succinate	300㎎	fuludarabine	270㎎	busulfan	438㎎	amphotericine B	600㎎	tacrolimus
36	F	ML	Auto-PB	156	57	N	N	none	O		0.4	N/A	N/A	－	N/A	N/A	N/A	0.4	N/A	N/A	－	N/A	N/A	N/A	0.4	N/A	N/A	＋－	N/A	N/A	N/A	N/A	N/A	N/A	N/A	N/A	N/A	N/A	0.4	0.4	heparin	25000U	granisetron hydrochloride	30㎎	cytarabine	2500㎎	etopocide	937.8㎎	ranimustine
45	M	AA	UR-BM	169	57	N	Y	2Gy	O	A	2	N/A	N/A	1＋	N/A	N/A	N/A	1.75	N/A	19	1＋	N/A	N/A	26	7.25	N/A	7	2＋	N/A	N/A	N/A	death	N/A	N/A		N/A	N/A	N/A	2.04	5.7	heparin	20400U	granisetron hydrochloride	27㎎	fludarabine	72㎎	cyclophosphamide	4000㎎	2-mercaptoethane sulfonate Na
43	M	AML	Allo-PB	170	74	N	N	none	A	A	0.8	N/A	N/A	－	N/A	N/A	N/A	1.2	N/A	N/A	N/A	N/A	N/A	N/A	0.7	N/A	N/A	未検	N/A	N/A	N/A	1.2	N/A	N/A	N/A	N/A	N/A	N/A	0.7	0.8	heparin	53200U	granisetron hydrochloride	27㎎	fludarabine	300㎎	busulfan	960㎎	hydrocortisone sodium succinate
65	M	MM/PCD	Auto-PB	170	72	N	N	none	A		0.82	N/A	73	－	N/A	N/A	N/A	0.82	N/A	N/A	－	N/A	N/A	N/A	0.96	N/A	N/A	＋－	N/A	N/A	N/A	0.96	N/A	N/A	－	N/A	N/A	N/A	0.72	0.82	dexamethasone	29.7㎎	granisetron hydrochloride	12㎎	melphalan	340㎎	hydrocortisone sodium succinate	125㎎	ascorbic acid
53	M	ML	Auto-PB	171	50	N	N	none	B		0.8	N/A	N/A	1＋	N/A	N/A	N/A	0.9	N/A	N/A	－	N/A	N/A	N/A	1.62	N/A	N/A	N/A	N/A	N/A	N/A	1.63	N/A	N/A	－	N/A	N/A	N/A	0.91	0.68	heparin	20000U	granisetron hydrochloride	30㎎	cytarabine	2536㎎	etopocide	1268㎎	ranimustine
55	F	MDS	Allo-PB	160	73	N	N	4Gｙ	A	O	0.7	N/A	N/A	－	N/A	N/A	N/A	0.7	N/A	N/A	－	N/A	N/A	17	0.74	N/A	N/A	1＋	N/A	N/A	20	1.11	N/A	30	1＋	N/A	N/A	76	0.7	0.5	heparin	54400U	fuludarabine	171㎎	melphalan	136.85㎎	dexamethasone	6.6㎎	metoclopramide
48	F	OTHER	UR-BM	158	48	N	N	2Gy	A	B	0.42	N/A	122	－	N/A	N/A	N/A	0.4	N/A	N/A	－	N/A	N/A	30	0.33	N/A	N/A	＋－	N/A	N/A	65	0.7	N/A	95	＋－	N/A	N/A	>=200	0.35	0.36	heparin	35000U	granisetron hydrochloride	3㎎	fludarabine	179㎎	busulfan	652.8㎎	micafungin
64	M	AML	UR-CB	170	67	N	N	none	A	O	0.75	N/A	N/A	－	N/A	N/A	N/A	0.71	N/A	N/A	－	N/A	N/A	<=10.0	0.81	N/A	N/A	1＋	N/A	N/A	11	moved	N/A	N/A		N/A	N/A	N/A	0.62	0.66	heparin	56000U	fuludarabine	223㎎	melphalan	248㎎	hydrocortisone sodium succinate	120㎎	d-chlorpheniramine maleate
[truncated: 59 more columns]
